# Supplementary material for: An interface engineering induced hierarchical NiCo/V2O3/C Schottky heterojunction catalyst for large-current-density hydrogen evolution reaction
Source: Royal Society of Chemistry journal article supplement (doi:10.1039/d3ta04983c), 2023-01-01
Supplement: d3ta04983c1.pdf [file d3ta04983c1.pdf]

## SUPPORTING INFORMATION

### **Interface engineering induced hierarchical NiCo/V<sub>2</sub>O<sub>3</sub>/C Schottky heterojunction catalyst for large-current-density hydrogen evolution reaction**

Danyang Li<sup>a,b</sup>, Jingkai Wang<sup>a,b</sup>, Shenghui Wang<sup>a</sup>, Bingxian Chu<sup>a</sup>, Rongyao Li<sup>a</sup>, Bin Li<sup>a,b</sup>, Lihui Dong<sup>a,b</sup>, Minguang Fan<sup>a,b\*</sup>, and Zhengjun Chen<sup>a,\*</sup>

<sup>a</sup>Guangxi Key Laboratory of Electrochemical Energy Materials, Guangxi Colleges and Universities Key Laboratory of Applied Chemistry Technology and Resource Development, School of Chemistry and Chemical Engineering, Guangxi University, Nanning 530004, P. R. China

<sup>b</sup>Guangxi Key Laboratory of Petrochemical Resource Processing and Process Intensification Technology, Guangxi University, Nanning 530004, P. R. China

\*Corresponding authors. E-mail: [fanmg@gxu.edu.cn](mailto:fanmg@gxu.edu.cn) and [zjchen@gxu.edu.cn](mailto:zjchen@gxu.edu.cn) (Z. Chen)

#### **Experimental Section**

##### **Chemicals and materials**

Ni foam ( $\geq 99\%$ ,  $\sim 1.8$  mm in thick) was purchased from Kunshan Jiayisheng Electronic Co., Ltd. Hydrochloric acid (HCl, 36–38%) was purchased from Chengdu Kelong Chemical Co., Ltd. Ethanol (C<sub>2</sub>H<sub>6</sub>O, 99.5%) and ethylene glycol (C<sub>2</sub>H<sub>6</sub>O<sub>2</sub>, 99.5%) were purchased from Sichuan Xilong Science Co., Ltd. Nickel chloride hexahydrate (NiCl<sub>2</sub>·6H<sub>2</sub>O, 98%) and cobalt chloride hexahydrate (CoCl<sub>2</sub>·6H<sub>2</sub>O, 98%) were purchased from Guangdong Guanghua Sci-Tech Co., Ltd. Ammonium metavanadate (NH<sub>4</sub>VO<sub>3</sub>, 99%) was purchased from Tianjin Guangfu Technology Development Co., Ltd. All the chemicals were used as received without further purification.

##### **Preparation of the NiCo/V<sub>2</sub>O<sub>3</sub>/C Catalyst**

The NiCo/V<sub>2</sub>O<sub>3</sub>/C catalyst was prepared by solvothermal and thermal reduction processes. Firstly, a piece of NF with area of 1.5 cm × 4 cm was ultrasonically cleaned in 3 M hydrochloric acid solution (HCl), ethanol and deionized (DI) water for 15 min each. Secondly, 1 mmol NiCl<sub>2</sub>·6H<sub>2</sub>O, 1 mmol CoCl<sub>2</sub>·6H<sub>2</sub>O and 2 mmol NH<sub>4</sub>VO<sub>3</sub> were dissolved in a mixed solution of 20 ml DI water and 20 ml ethylene glycol (EG) and then transferred into a Teflon lined stainless autoclave with clean NF. Then keep the sealed autoclave at 180 °C for 12h. The product after reaction was washed several times with DI water and dried overnight at 60 °C to get the hydrothermal precursor. Finally, the hydrothermal precursor was thermally reduced at 400 °C in an Ar/H<sub>2</sub> atmosphere for 2 h under to obtain the target sample.

### **Preparation of Other Contrast Catalysts**

For comparison, the preparation of the NiCo/C and V<sub>2</sub>O<sub>3</sub>/C catalysts were similar to the above method. The preparation of NiCo/C catalyst is to disperse NiCl<sub>2</sub>·6H<sub>2</sub>O and CoCl<sub>2</sub>·6H<sub>2</sub>O in the mixed solution during the above preparation process, while V<sub>2</sub>O<sub>3</sub>/C catalyst is to add only NH<sub>4</sub>VO<sub>3</sub>.

The Pt/C catalyst was prepared by the different method. Firstly, 5 mg of platinum/carbon (Pt/C, 20 wt% Pt on Johnson Matthey HISPEC3000) was ultrasonically dispersed in the mixed solution of 700 μL water, 300 μL isopropyl alcohol ((CH<sub>3</sub>)<sub>2</sub>CHOH, 99.7%, Shanghai Shenbo Chemical Co., Ltd) and 80 μL Nafion solution. Then, 5 μL of the catalyst ink was drop casted on the glassy-carbon electrode (0.07 cm<sup>2</sup>).

### **Materials Characterization**

The phase structure of the synthesized samples was analyzed by X-ray diffraction (XRD, Rigaku D/MAX-2500, Cu K<sub>α</sub> radiation). Field-emission scanning electron microscope (FE-SEM, Thermo Fisher Scientific FEI Quattro S) and transmission electron microscope (TEM, FEI Talos F200S) were used to determine the morphology and composition of the samples. The synthesized samples were also characterized by Raman microscope (Renishaw, Horiba HR Evolution-800) and The X-ray photoelectron spectroscopy (XPS, Thermo Scientific ESCALAB 250Xi). The XPS peak positions were calibrated to the C 1s line (at 284.6 eV) of adventitious

hydrocarbon.

### **Electrochemical Measurements**

All the electrochemical measurements were performed by the CHI 660E electrochemical analyzer (CH Instruments, Chenhua Co., Shanghai, China) and CS350M Electrochemical Workstation (Zhenming Scientific Instrument Co., Ltd. Wuhan, China) in a standard three-electrode system. The NF-supported catalysts were directly used as working electrode, the graphite rod was used as counter electrode, and the Hg/HgO electrode (with 1.0 M KOH) was used as reference electrode. All the potentials reported in our manuscript were converted to the reversible hydrogen electrode (RHE) scale according to the equation:

$$E(\text{RHE}) = E(\text{Hg/HgO}) + 0.924 \text{ V.}$$

The polarization curves were recorded using linear sweep voltammetry (LSV) method by scanning the potential at a scan rate of  $2 \text{ mV s}^{-1}$ . Chrono potentiometric (CP) method at different target current densities was carried out to measure the long-term stability. Cyclic voltammetry (CV) cycles at the scan rate of  $100 \text{ mV s}^{-1}$  were performed to investigate another electrochemical stability test. All the potentials were manually corrected with 90% level iR compensation. The electrochemical impedance spectroscopy (EIS) was conducted using the CHI660E (CH Instruments, Inc.) electrochemical workstation, at overpotential of  $10 \text{ mA cm}^{-2}$  in a frequency range from 0.1 MHz to 0.1 Hz with an AC amplitude of 5 mV. The double-layer capacitance ( $C_{\text{dl}}$ ) with CV method was measured to estimate the electrochemically active surface area (ECSA). The specific activity of catalysts was normalized by their ECSA, and the ECSA was calculated by the following equation:

$$\text{ECSA} = C_{\text{dl}} / C_{\text{s}} \tag{1}$$

where  $C_{\text{dl}}$  is the double layer capacitance, and  $C_{\text{s}}$  is the specific capacitance.

### **Density functional theory (DFT) calculations**

All the Density Functional Theory (DFT) calculations were performed using Vienna Ab initio Simulation Package (VASP) with the projector augmented wave (PAW) method. The Perdew-Burke-Ernzerhof (PBE) parameterization of the generalized

gradient approximation (GGA) is adopted to describe the exchange and correlation potential. During the geometry optimization and electronic structure calculations, the cut-off energy of the plane-wave basis set is 400 eV, and single gamma-point grid sampling was used for Brillouin zone integration. Atomic positions were optimized until the forces were less than 0.05 eV/Å. The first Brillouin zone was sampled by  $1 \times 1 \times 1$  k-mesh and a vacuum thickness of over 15 Å between periodic images was adopted, which was found to be sufficient for accurate results. Grimme's method (DFT-D3) was carried out to include explicit dispersion correction terms to the energy.

The work functions of NiCo (111),  $V_2O_3$  (001), and NiCo/ $V_2O_3$  Mott-Schottky heterojunction were calculated to study the origin of electron transfer. According to the current theories, the work function ( $\Phi$ ) is the minimum energy required for an electron to escape from the Fermi level to the vacuum level, it can be expressed as the following equation:

$$\Phi = E(\text{Vacuum}) - E(\text{Fermi}) \quad (2)$$

where  $E(\text{Vacuum})$  and  $E(\text{Fermi})$  are the electrostatic potentials of vacuum energy level and Fermi energy level, respectively.

The calculation of CDD at NiCo/ $V_2O_3$  can be presented as the following equation:

$$\rho = \rho(\text{NiCo}/V_2O_3) - \rho(\text{NiCo}) - \rho(V_2O_3) \quad (3)$$

where  $\rho(\text{NiCo}/V_2O_3)$ ,  $\rho(\text{NiCo})$  and  $\rho(V_2O_3)$  represent the charge density of the corresponding geometries.

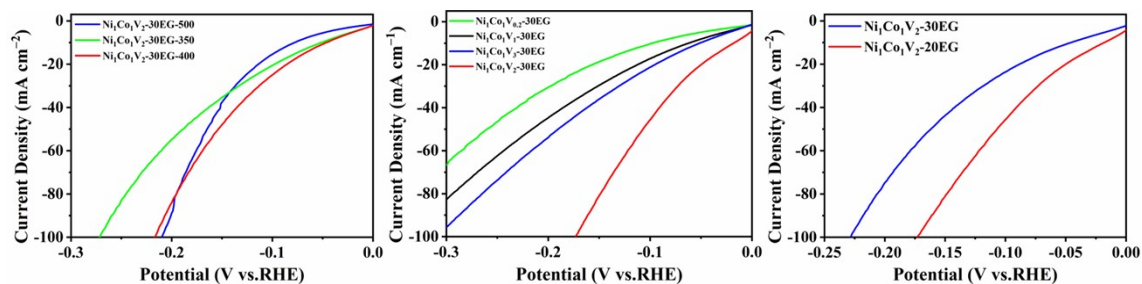

**Figure S1.** HER polarization curves of hydrothermal precursor samples with various annealing temperatures, amounts of  $NH_4VO_3$  and volumes of ethylene glycol during

the annealing process.

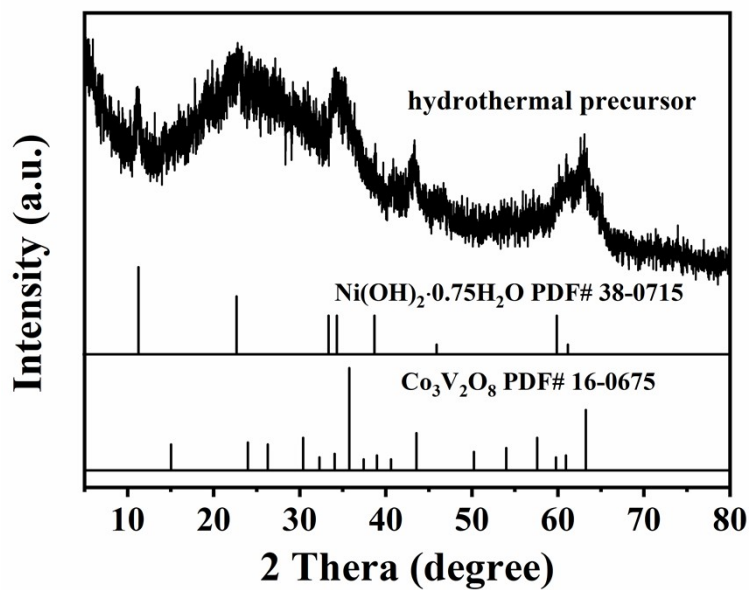

Figure S2. XRD result of the hydrothermal precursor sample.

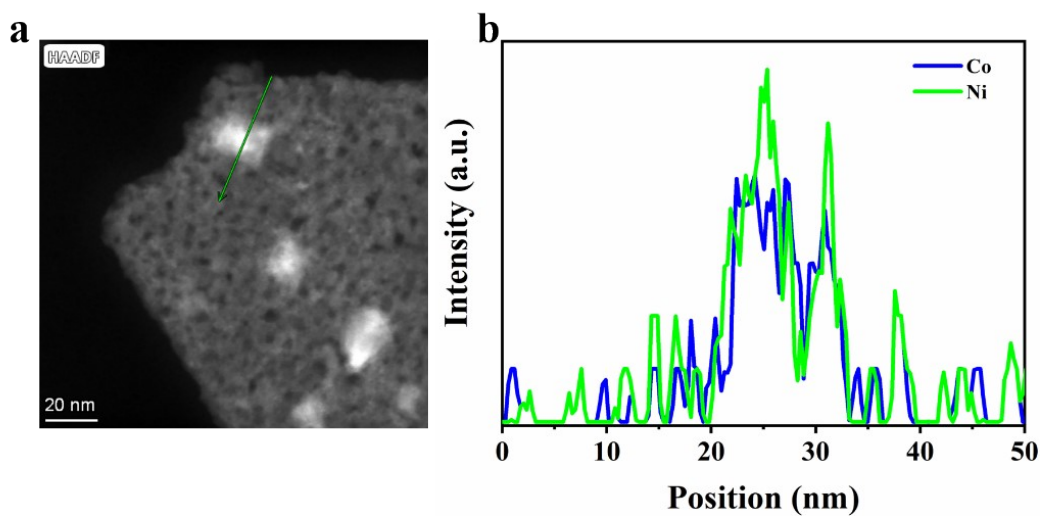

Figure S3. a) EDS line scan and b) corresponding Ni,Co dispersion of NiCo/V<sub>2</sub>O<sub>3</sub>/C sample.

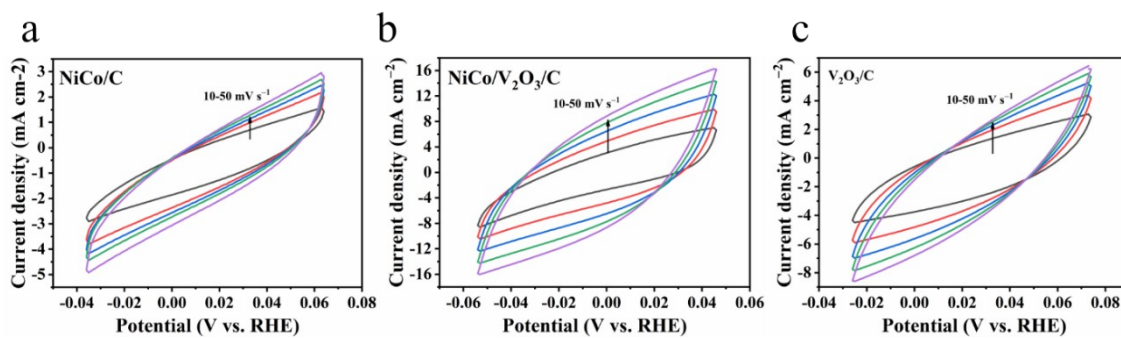

**Figure S4.** Cyclic voltammogram profiles of the NiCo/V<sub>2</sub>O<sub>3</sub>/C sample and contrast samples at different scan rates

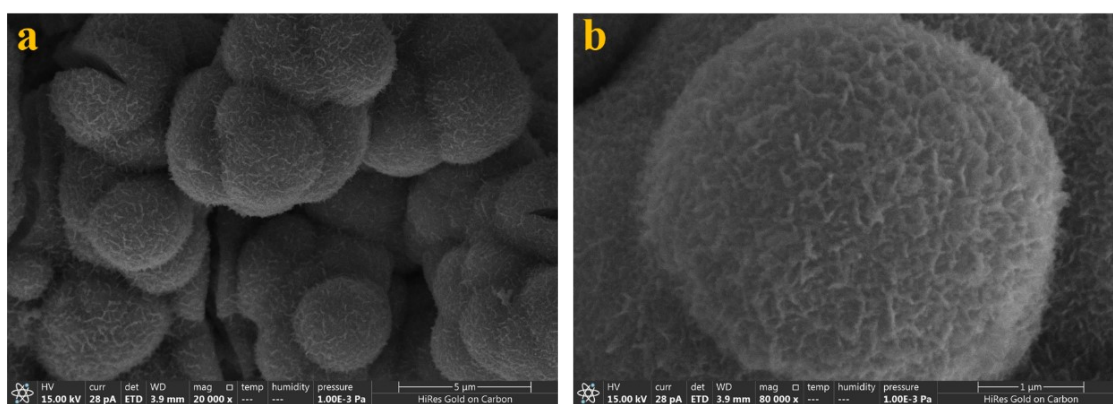

**Figure S5.** SEM images of the NiCo/V<sub>2</sub>O<sub>3</sub>/C sample after HER stability test.

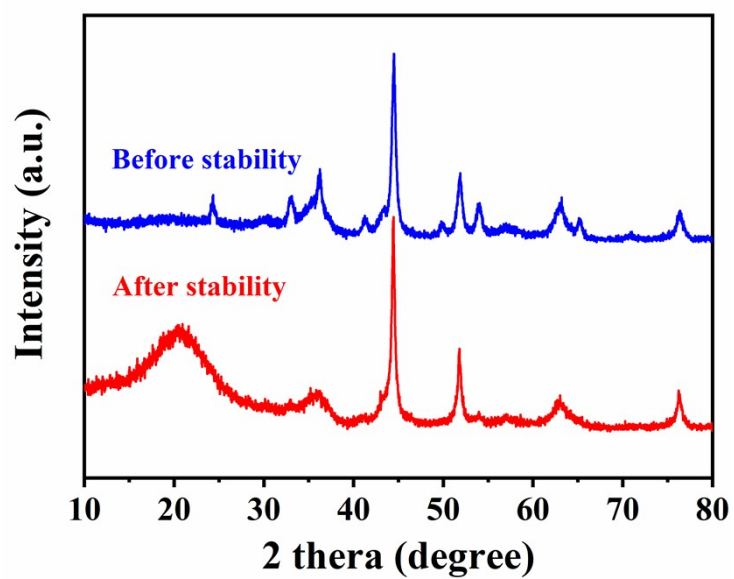

**Figure S6.** XRD result of the NiCo/V<sub>2</sub>O<sub>3</sub>/C sample after stability test.

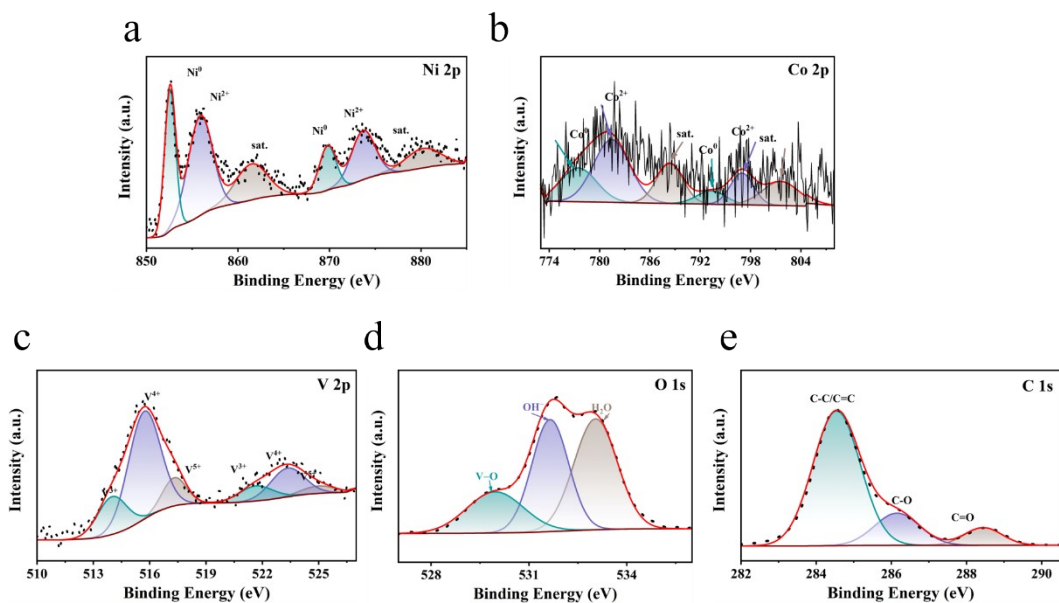

**Figure S7.** (a) Ni 2p and (b) Co 2p, (c) V 2p, (d) O 1s (e) C 1sXPS spectra of the NiCo/V<sub>2</sub>O<sub>3</sub>/C sample after stability test.

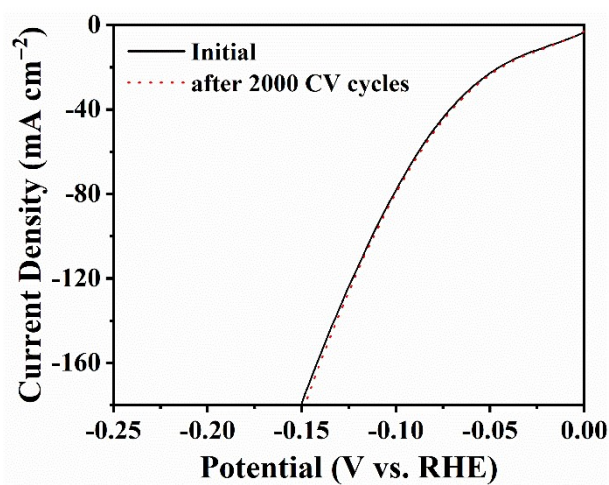

**Figure. S8.** Comparison of HER polarization curves of NiCo/V<sub>2</sub>O<sub>3</sub>/C catalyst before and after 2000 CV cycles.

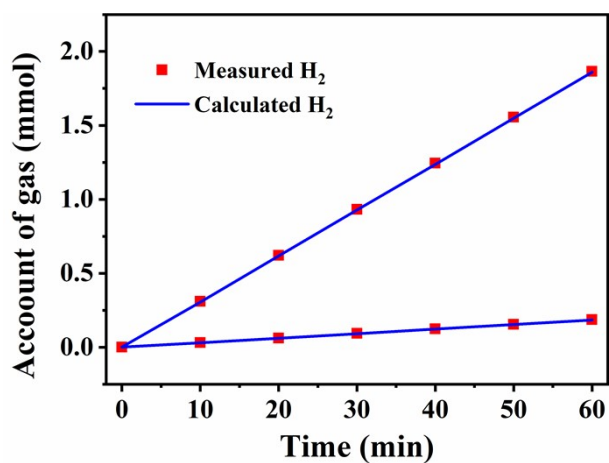

**Figure S9.** Faradaic efficiency and practical measured amount of H<sub>2</sub> product vs. theoretically calculated quantities at 10 mA cm<sup>-2</sup> and 100 mA cm<sup>-2</sup>.

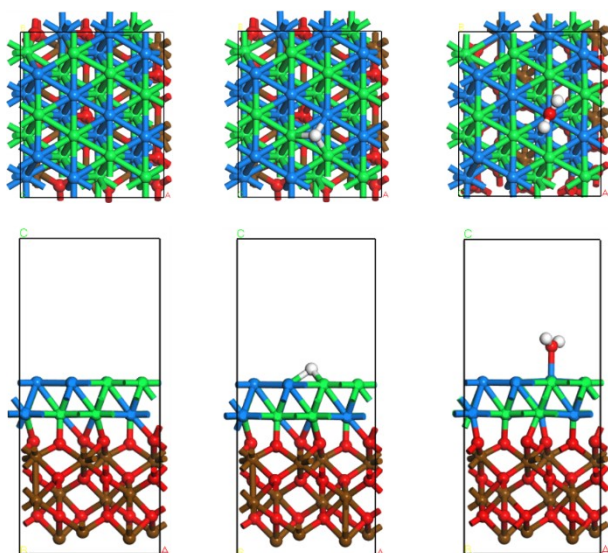

**Fig. S10** Calculated geometries of (a) clean, (b) hydrogen adsorbed, (c) H<sub>2</sub>O adsorbed on NiCo/V<sub>2</sub>O<sub>3</sub> surface. Green, blue, brown, red, and white spheres in geometries represent the Ni, Co, V, O, and H atoms, respectively.



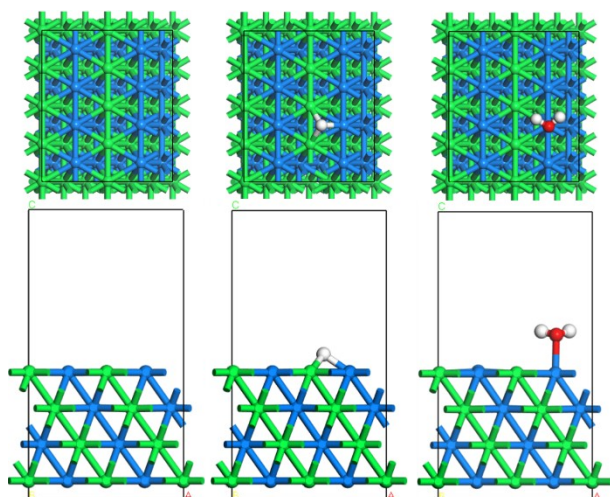

**Fig. S11** Calculated geometries of (a) clean, (b) hydrogen adsorbed, (c) H<sub>2</sub>O adsorbed on NiCo alloy surface. Green, blue, red, and white spheres in geometries represent the Ni, Co, O, and H atoms, respectively.

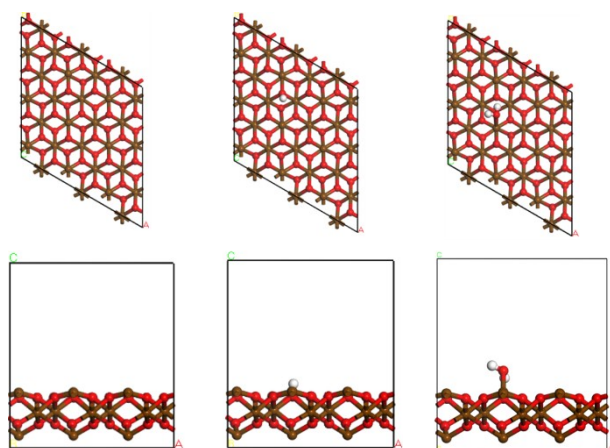

**Fig. S12** Calculated geometries of (a) clean, (b) hydrogen adsorbed, (c) H<sub>2</sub>O adsorbed on V<sub>2</sub>O<sub>3</sub> surface. Brown, red, and white spheres in geometries represent the V, O, and H atoms, respectively.

**Table S1.** Summary of HER performance of recently reported catalysts in literature.

| Catalyst                                                | Electrolyte             | Current density (mA cm <sup>-2</sup> ) | Overpotential (mV) | Ref.      |
|---------------------------------------------------------|-------------------------|----------------------------------------|--------------------|-----------|
| W-NiCo                                                  | 1.0 M KOH               | 10                                     | 192                | 1         |
| Mo <sub>2</sub> N /CeO <sub>2</sub> @NF                 | 1.0 M KOH               | 10                                     | 26                 | 2         |
| CuCo@NC                                                 | 1.0 M KOH               | 10                                     | 163                | 3         |
| Ni <sub>3</sub> N-V <sub>2</sub> O <sub>3</sub> -1-1/NF | 1.0 M KOH               | 10                                     | 40                 | 4         |
| Ni <sub>4</sub> Mo-V <sub>2</sub> O <sub>3</sub>        | 1.0 M KOH               | 10                                     | 39.3               | 5         |
| TMP NiZn-Ni/NF                                          | 1.0 M KOH               | 600                                    | 233                | 6         |
| NiCo@C-NiCoMoO/NF                                       | 1.0 M KOH               | 10                                     | 39                 | 7         |
|                                                         | 1.0 M KOH               | 1000                                   | 266                |           |
| NiCoFe-NDA                                              | 1.0 M KOH               | 10                                     | 215                | 8         |
|                                                         | 1.0 M KOH               | 325                                    | 1800               |           |
| CrO <sub>x</sub> /Cu-Ni/Cu foam                         | pH 7 buffer electrolyte | 10                                     | 48                 | 9         |
| V <sub>2</sub> O <sub>3</sub> /Ni/NF                    | 1.0 M KOH               | 10                                     | 54                 | 10        |
| NiCo@N,P-CNSs                                           | 1.0 M KOH               | 10                                     | 99                 | 11        |
| Ni/CeO <sub>2</sub> @N-CNFs                             | 1.0 M KOH               | 10                                     | 100                | 12        |
| V-CoP                                                   | 1.0 M KOH               | 10                                     | 46                 | 13        |
| Ni <sub>3</sub> N-VN                                    | 1.0 M KOH               | 10                                     | 37                 | 14        |
| A-NiCo LDH/NF                                           | 1.0 M KOH               | 100                                    | 151                | 15        |
|                                                         | 1.0 M KOH               | 500                                    | 286                |           |
|                                                         | 1.0 M KOH               | 1000                                   | 381                |           |
| Cu@CoFe                                                 | 1.0 M KOH               | 10                                     | 171                | 16        |
| NiCoS <sub>x</sub> @CoCH NAs/NF                         | 1.0 M KOH               | 1000                                   | 438                | 17        |
| NiCo/V <sub>2</sub> O <sub>3</sub> /C/NF                | 1.0 M KOH               | 10                                     | 23                 | This work |
|                                                         | 1.0 M KOH               | 1000                                   | 396                | This work |

## Reference:

- 1.D. Gao, J. Guo, H. He, P. Xiao and Y. Zhang, *Chem. Eng. J.*, 2022, **430**, 133110.
- 2.C. Wang, X. Lv, P. Zhou, X. Liang, Z. Wang, Y. Liu, P. Wang, Z. Zheng, Y. Dai, Y. Li, M. H. Whangbo and B. Huang, *ACS Appl. Mater. Interfaces*, 2020, **12**, 29153-29161.
- 3.M. Kuang, Q. Wang, P. Han and G. Zheng, *Adv. Energy Mater.*, 2017, **7**, 1700193-1700200.
- 4.P. Zhou, G. Zhai, X. Lv, Y. Liu, Z. Wang, P. Wang, Z. Zheng, H. Cheng, Y. Dai and B. Huang, *Appl. Catal. B*, 2021, **283**, 119590.
- 5.Z. Xie, W. Wang, D. Ding, Y. Zou, Y. Cui, L. Xu and J. Jiang, *J. Mater. Chem. A*, 2020, **8**, 12169-12176.
- 6.Q. Zhou, Q. Hao, Y. Li, J. Yu, C. Xu, H. Liu and S. Yan, *Nano Energy*, 2021, **89**, 106402.
- 7.G. Qian, J. Chen, T. Yu, L. Luo and S. Yin, *Nanomicro Lett*, 2021, **13**, 77.
- 8.B. Y. Xia, Y. Yan, X. Wang, Y. Kong, J. Zhang, P. Wang, C. Xia, Y. Zhu, J. Liu and K. Yue, *Energy Environ. Sci.*, 2021, **14**, 6546-6553.
- 9.C.-T. Dinh, A. Jain, F. P. G. de Arquer, P. De Luna, J. Li, N. Wang, X. Zheng, J. Cai, B. Z. Gregory, O. Voznyy, B. Zhang, M. Liu, D. Sinton, E. J. Crumlin and E. H. Sargent, *Nat. Energy*, 2018, **4**, 107-114.
- 10.Q. Zhang, B. Liu, L. Li, Y. Ji, C. Wang, L. Zhang and Z. Su, *Small*, 2021, **17**, 2005769-2005778.
- 11.T. Li, G. Luo, Q. Liu, S. Li, Y. Zhang, L. Xu, Y. Tang, J. Yang and H. Pang, *Chem. Eng. J.*, 2021, **410**, 128325.
- 12.T. Li, J. Yin, D. Sun, M. Zhang, H. Pang, L. Xu, Y. Zhang, J. Yang, Y. Tang and J. Xue, *Small*, 2022, **18**, 2106592 -2106601
- 13.R. Zhang, Z. Wei, G. Ye, G. Chen, J. Miao, X. Zhou, X. Zhu, X. Cao and X. Sun, *Adv. Energy Mater.*, 2021, **11**, 2101758-2101768.
- 14.H. Yan, Y. Xie, A. Wu, Z. Cai, L. Wang, C. Tian, X. Zhang and H. Fu, *Adv. Mater.*, 2019, **31**, 1901174- 1901182.
- 15.H. Yang, Z. Chen, P. Guo, B. Fei and R. Wu, *Appl. Catal. B*, 2020, **261**, 118240.
- 16.L. Yu, H. Zhou, J. Sun, F. Qin, D. Luo, L. Xie, F. Yu, J. Bao, Y. Li, Y. Yu, S. Chen and Z. Ren, *Nano Energy*, 2017, **41**, 327-336.
- 17.X. Zhang, R. Zheng, M. Jin, R. Shi, Z. Ai, A. Amini, Q. Lian, C. Cheng and S. Song, *ACS Appl. Mater. Interfaces*, 2021, **13**, 35647-35656.
